# Supplementary material
Source: MDPI journal article supplement (https://www.mdpi.com/2077-1312/12/2/246)
Supplement: s1 [file s1]

Archive with 2 entries (2 files):
- FigureS4.pdf
- Supplementary_Material.pdf
