# Supplementary material
Source: MDPI journal article supplement (https://www.mdpi.com/2077-1312/12/2/246)

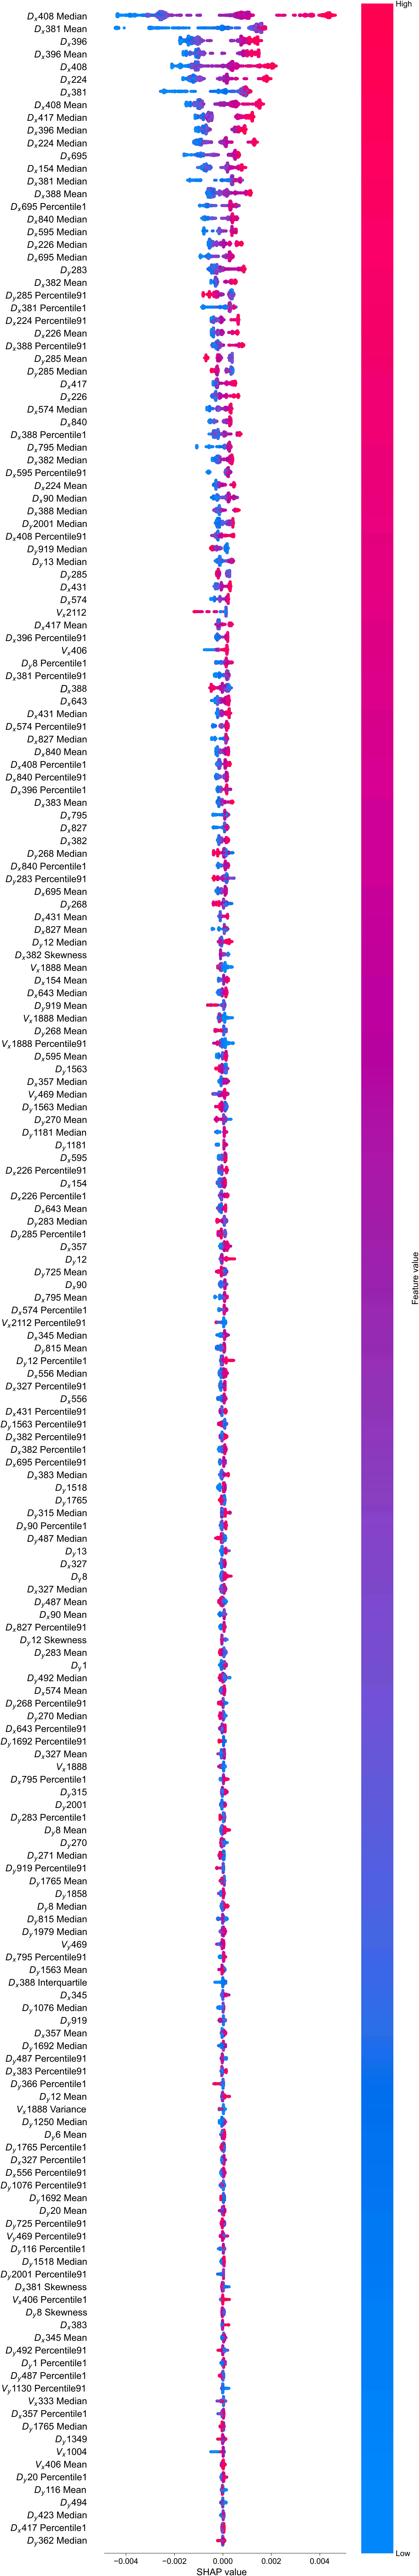

Supplement: s1 [file s1]
